# Supplementary material for: Tracing Key Molecular Regulators of Lipid Biosynthesis in Tuber Development of Cyperus esculentus Using Transcriptomics and Lipidomics Profiling
Source: MDPI journal article supplement (doi:10.3390/genes12101492), 2021-09-24
Supplement: s1 [file s1]

| Supplementary table S4: Relative composition of PE molecular species during five developing stages of tuber |          |          |          |          |          |
|-------------------------------------------------------------------------------------------------------------|----------|----------|----------|----------|----------|
|                                                                                                             | 35DAS    | 50DAS    | 70DAS    | 90DAS    | 120DAS   |
| PE (15:0_18:2)                                                                                              | 0.008371 | 0.007456 | 0.007778 | 0.00274  | 0.001794 |
| PE (16:0_18:3)                                                                                              | 0.008412 | 0.007959 | 0.006862 | 0.003054 | 0.001913 |
| PE (16:0_20:1)                                                                                              | 0.008079 | 0.007548 | 0.006936 | 0.002489 | 0.001954 |
| PE (18:1_22:0)                                                                                              | 0.007992 | 0.007459 | 0.007299 | 0.003256 | 0.001909 |
| PE (18:1_24:0)                                                                                              | 0.008354 | 0.007292 | 0.006799 | 0.002268 | 0.001588 |
| PE (18:2_23:0)                                                                                              | 0.008335 | 0.00731  | 0.006909 | 0.003296 | 0.001685 |
| PE (18:3_18:2)                                                                                              | 0.00828  | 0.00801  | 0.006477 | 0.003058 | 0.001707 |
| PE (20:0_18:2)                                                                                              | 0.00802  | 0.007765 | 0.006919 | 0.002546 | 0.001772 |
| PE (25:0_18:1)                                                                                              | 0.007969 | 0.007299 | 0.007214 | 0.002656 | 0.001749 |
| PE (25:0_18:2)                                                                                              | 0.008378 | 0.007902 | 0.006807 | 0.002971 | 0.001429 |
