# Supplementary material for: Tracing Key Molecular Regulators of Lipid Biosynthesis in Tuber Development of Cyperus esculentus Using Transcriptomics and Lipidomics Profiling
Source: MDPI journal article supplement (doi:10.3390/genes12101492), 2021-09-24
Supplement: s1 [file s1]

Supplementary table S5: Dataset statistics of transcriptome sequencing of tiger nut tuber during five developing stages

| Sample name | Total Reads | Mapping rate     |
|-------------|-------------|------------------|
| 35DAS-1     | 51648136    | 39569964(76.61%) |
| 35DAS-2     | 50040900    | 38931528(77.80%) |
| 35DAS-3     | 60458772    | 47043460(77.81%) |
| 50DAS-1     | 58561086    | 46472058(79.36%) |
| 50DAS-2     | 40214314    | 30935464(76.93%) |
| 50DAS-3     | 52606584    | 40701820(77.37%) |
| 70DAS-1     | 46273318    | 36858328(79.65%) |
| 70DAS-2     | 60981932    | 47918946(78.58%) |
| 70DAS-3     | 39815914    | 31025786(77.92%) |
| 90DAS-1     | 46748192    | 37663982(80.57%) |
| 90DAS-2     | 42709522    | 34485304(80.74%) |
| 90DAS-3     | 52464046    | 41639592(79.37%) |
| 120DAS-1    | 40909822    | 32892554(80.40%) |
| 120DAS-2    | 57417830    | 46430524(80.86%) |
| 120DAS-3    | 43729798    | 34592926(79.11%) |
