# Supplementary material for: Tracing Key Molecular Regulators of Lipid Biosynthesis in Tuber Development of Cyperus esculentus Using Transcriptomics and Lipidomics Profiling
Source: MDPI journal article supplement (doi:10.3390/genes12101492), 2021-09-24
Supplement: s1 [file s1]

Supplementary table S3: Relative composition of PC molecular species during five developing stages of tuber

|               | 35DAS    | 50DAS    | 70DAS    | 90DAS    | 120DAS   |
|---------------|----------|----------|----------|----------|----------|
| PC(15:0_18:1) | 0.008904 | 0.009439 | 0.00874  | 0.007522 | 0.0084   |
| PC(16:0_18:2) | 0.008992 | 0.008777 | 0.009031 | 0.012601 | 0.00848  |
| PC(17:0_18:2) | 0.008746 | 0.009219 | 0.009284 | 0.008046 | 0.00833  |
| PC(17:0_18:3) | 0.009042 | 0.009043 | 0.008848 | 0.007549 | 0.008556 |
| PC(18:1_14:0) | 0.009307 | 0.009231 | 0.008661 | 0.008662 | 0.008427 |
| PC(18:3_18:2) | 0.00884  | 0.0095   | 0.007918 | 0.007425 | 0.008486 |
| PC(18:3_18:3) | 0.009012 | 0.009304 | 0.008538 | 0.007008 | 0.008556 |
| PC(22:0_11:2) | 0.008992 | 0.009116 | 0.007796 | 0.006915 | 0.008785 |
| PC(26:0_18:1) | 0.00898  | 0.00903  | 0.008021 | 0.007915 | 0.008274 |
