# Supplementary material for: Tracing Key Molecular Regulators of Lipid Biosynthesis in Tuber Development of Cyperus esculentus Using Transcriptomics and Lipidomics Profiling
Source: MDPI journal article supplement (doi:10.3390/genes12101492), 2021-09-24

Supplementary figure S2: Comparative analysis of PC.  
(A) and PE (B) containing unsaturated fatty acyl during tuber developing stages.

A

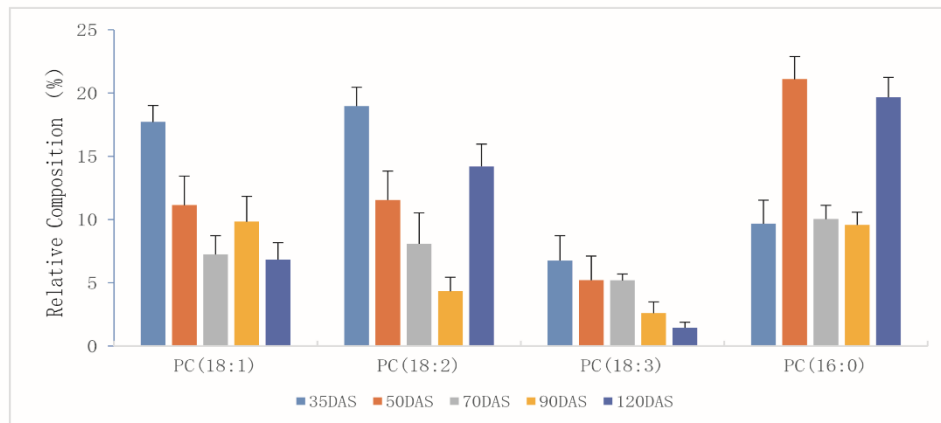

B

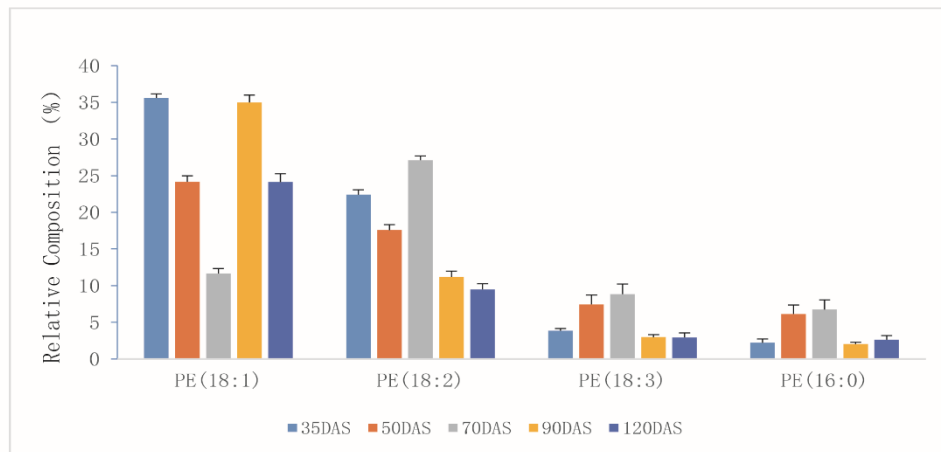

Supplement: s1 [file s1]
