# Supplementary material for: Tracing Key Molecular Regulators of Lipid Biosynthesis in Tuber Development of Cyperus esculentus Using Transcriptomics and Lipidomics Profiling
Source: MDPI journal article supplement (doi:10.3390/genes12101492), 2021-09-24
Supplement: s1 [file s1]

Supplementary table s2: Relative composition of DAG molecular species during five developing stages of tuber

|                 | 35DAS       | 50DAS       | 70DAS       | 90DAS       | 120DAS      |
|-----------------|-------------|-------------|-------------|-------------|-------------|
| DAG (16:1_18:2) | 0.007986177 | 0.0073403   | 0.005182268 | 0.001900879 | 0.000269686 |
| DAG (17:0_18:2) | 0.00883913  | 0.007722247 | 0.003961231 | 0.002901615 | 0.00101101  |
| DAG (17:1_18:2) | 0.008610044 | 0.008000963 | 0.00535676  | 0.003200354 | 0.001332459 |
| DAG (18:0_18:1) | 0.008486487 | 0.008295294 | 0.004838694 | 0.001900692 | 0.001340316 |
| DAG (18:0_18:3) | 0.008464089 | 0.008226002 | 0.005623852 | 0.001586181 | 0.00051107  |
| DAG (18:2_23:0) | 0.008632306 | 0.007052828 | 0.005492744 | 0.002819649 | 0.000472385 |
| DAG (20:1_18:1) | 0.009065319 | 0.007793153 | 0.004755636 | 0.002833876 | 0.001329256 |
| DAG (20:1_18:2) | 0.008949866 | 0.008123774 | 0.005617029 | 0.002615838 | 0.001522453 |
| DAG (22:0_18:2) | 0.008272984 | 0.008487469 | 0.004876889 | 0.001914696 | 0.000597618 |
| DAG (24:0_18:2) | 0.008678135 | 0.007563337 | 0.006302619 | 0.00267054  | 0.000738168 |
| DAG (24:0_18:3) | 0.008560578 | 0.008125095 | 0.004753791 | 0.002635993 | 0.001410738 |
| DAG (25:0_18:2) | 0.008661754 | 0.007978621 | 0.006147016 | 0.002284531 | 0.001180157 |
| DAG (26:0_18:2) | 0.007997229 | 0.007946657 | 0.006408639 | 0.003121843 | 0.001579218 |
| DAG (6:0_12:1)  | 0.008305858 | 0.007872333 | 0.006259829 | 0.00207823  | 0.001088487 |
| DAG (6:0_12:2)  | 0.008633061 | 0.007775991 | 0.005939021 | 0.001493127 | 0.000737578 |
| DAG (6:0_9:0)   | 0.008471706 | 0.007501614 | 0.006197295 | 0.00173627  | 0.00050555  |
