# Supplementary material for: Tracing Key Molecular Regulators of Lipid Biosynthesis in Tuber Development of Cyperus esculentus Using Transcriptomics and Lipidomics Profiling
Source: Genes (Basel). 2021 Sep 24;12(10):1492. doi: 10.3390/genes12101492 (PMC8535953; doi:10.3390/genes12101492)
Supplement: Supplementary file 1 [file genes-12-01492-s001.zip]

Archive with 7 entries (7 files):
- supplementary Figure S1.pdf
- Supplementary Figure S2.pdf
- Supplementary table S1.pdf
- Supplementary table S2.pdf
- Supplementary table S3.pdf
- Supplementary table S4.pdf
- supplementary table S5.pdf
